CORRECTION

# Correction: Awareness, prevalence, treatment, and control of type 2 diabetes in a semi-urban area of Nepal: Findings from a cross-sectional study conducted as a part of COBIN-D trial

**Bishal Gyawali, Martin Rune Hassan Hansen, Mia Buhl Povlsen, Dinesh Neupane, Peter Krogh Andersen, Craig Steven McLachlan, Anelli Sandbæk, Abhinav Vaidya, Per Kallestrup**

The following information is missing from the Funding section: Publication costs were funded by the Diabetes prevention and management by lay health workers in Nepal project-Nepal Development Society (NEDS) and World Diabetes Foundation, Denmark.

## Reference

1. Gyawali B, Hansen MRH, Povlsen MB, Neupane D, Andersen PK, McLachlan CS, et al. (2018) Awareness, prevalence, treatment, and control of type 2 diabetes in a semi-urban area of Nepal: Findings from a cross-sectional study conducted as a part of COBIN-D trial. PLoS ONE 13(11): e0206491. <https://doi.org/10.1371/journal.pone.0206491> PMID: 30388140

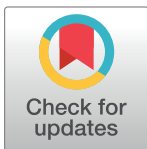

## OPEN ACCESS

**Citation:** Gyawali B, Hansen MRH, Povlsen MB, Neupane D, Andersen PK, McLachlan CS, et al. (2018) Correction: Awareness, prevalence, treatment, and control of type 2 diabetes in a semi-urban area of Nepal: Findings from a cross-sectional study conducted as a part of COBIN-D trial. PLoS ONE 13(12): e0209046. <https://doi.org/10.1371/journal.pone.0209046>

**Published:** December 6, 2018

**Copyright:** © 2018 Gyawali et al. This is an open access article distributed under the terms of the [Creative Commons Attribution License](https://creativecommons.org/licenses/by/4.0/), which permits unrestricted use, distribution, and reproduction in any medium, provided the original author and source are credited.
